# Supplementary material
Source: MDPI journal article supplement (https://www.mdpi.com/2673-6179/1/2/8)
Supplement: s1 [file s1]

Archive with 1 entries (1 files):
- dermato-1400990-supplementary.pdf
